RESEARCH ARTICLE

# Effects of Treatment of Treadmill Combined with Electro-Acupuncture on Tibia Bone Mass and Substance P Expression of Rabbits with Sciatic Nerve Injury

Yan Wang<sup>1,2\*</sup>, Qiang Tang<sup>1,2</sup>, Luwen Zhu<sup>1,2‡</sup>, Ruyi Huang<sup>2</sup>, Lei Huang<sup>2‡</sup>, Melanie Koleini<sup>3</sup>, Dequan Zou<sup>4</sup>

**1** The 2nd affiliated hospital of Heilongjiang University of Chinese Medicine, Harbin, China, **2** Heilongjiang University of Chinese Medicine, Harbin, China, **3** HRPO, Washington University School of Medicine, St. Louis, Missouri, United States of America, **4** Program in Physical Therapy, Washington University School of Medicine, St. Louis, Missouri, United States of America

‡ Current address: Rehabilitation Centre of the 2nd affiliated hospital of Heilongjiang University of Chinese Medicine, 411 Guogeli Street Harbin City, Heilongjiang Province, 150001, China

\* [swallow-1113@163.com](mailto:swallow-1113@163.com)

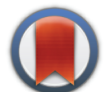

CrossMark  
click for updates

OPEN ACCESS

**Citation:** Wang Y, Tang Q, Zhu L, Huang R, Huang L, Koleini M, et al. (2016) Effects of Treatment of Treadmill Combined with Electro-Acupuncture on Tibia Bone Mass and Substance P Expression of Rabbits with Sciatic Nerve Injury. PLoS ONE 11 (11): e0164652. doi:10.1371/journal.pone.0164652

**Editor:** Silvana Allodi, Federal University of Rio de Janeiro, BRAZIL

**Received:** April 20, 2016

**Accepted:** September 28, 2016

**Published:** November 23, 2016

**Copyright:** © 2016 Wang et al. This is an open access article distributed under the terms of the [Creative Commons Attribution License](https://creativecommons.org/licenses/by/4.0/), which permits unrestricted use, distribution, and reproduction in any medium, provided the original author and source are credited.

**Data Availability Statement:** All relevant data are within the paper and its Supporting Information files.

**Funding:** This study was supported by the Fund of Innovative Talents of the Heilongjiang University of Chinese Medicine (grant number 051290). Additional funding for this study was provided by a postdoctoral research award from the Administration Office of Heilongjiang Postdoctoral Program (grant number LBH-Z13202).

## Abstract

The peripheral nervous system may play an important role in normal bone maintenance and remodeling. Substance P (SP) is a neuropeptide associated with bone loss and formation that may mediate the effects of the nervous system. The purpose of this study is to determine if treadmill running combined with electro-acupuncture at Jiaji acupoints (Jiaji-EA) affects tibial bone mass and SP expression in rabbits with sciatic nerve injury. Twenty-four juvenile male New Zealand white rabbits were randomly assigned to one of 4 groups: sham injury control (sham), sciatic nerve crush control (SNCr), treadmill running (treadmill), and Jiaji-EA combined with treadmill running (ET group). The SNCr, treadmill, and ET groups all had an induced sciatic nerve crush injury of approximately 2mm. Control groups received no intervention; the treadmill and ET groups were trained by treadmill; the ET group also received Jiaji-EA. After the 4 weeks of treatment, toe-spreading index (TSI), BMD, bone strength, and SP expression in the tibia were significantly lower in the nerve injury groups (SNCr, treadmill, and ET) compared to the sham groups ( $p < 0.05$ ). Treatment (treadmill and ET groups) increased all measures compared to the SNCr group ( $p < 0.05$ ). Further, TSI, BMD, bone strength, and SP expression in the ET group were higher than the treadmill group ( $p < 0.05$ ). Our results indicate that treadmill therapy combined with electro-acupuncture at Jiaji acupoints prevents bone loss in rabbit tibias after sciatic nerve injury. This may occur in two ways: indirectly in association with axon regeneration and directly via loading on the bone mediated through increased SP expression. This study provides important evidence for the clinical treatment of bone loss after peripheral nerve injury.

**Competing Interests:** The authors have declared that no competing interests exist.

## Introduction

Injuries to peripheral nerves differ from injuries to most other tissue types because further neuron and target organ degeneration often follows [1]. Fortunately, the peripheral nervous system (PNS) has an innate capacity to regrow to their targets, including muscle, bone, and skin. However, the regeneration process is slow and incomplete [2] and is often accompanied by disturbing motor, autonomic and sensory consequences [3]. The peripheral nervous system may play an important role in bone healing following fracture or other trauma [4–6]. Bone fractures accompanied by peripheral nerve injuries heal slower [7] and sensory denervation negatively affects long-term prognosis [8]. Substance P (SP), a neuropeptide belonging to the tachykinin family, is widely distributed in the body, particularly in the central and peripheral nervous systems where it acts as a neurotransmitter or neuromodulator [9]. Studies suggest that the absence of SP reduces bone formation rate associated with fracture healing [10,11].

Exercise affects bones in both humans and animals. Dynamic exercise is superior to static exercise in increasing bone mass and greater intensity training leads to greater increases in bone mass [12]. Increased mechanical loading is also beneficial to bone growth. Running-generated impact and load on bone are believed to increase cortical bone mass through remodeling.

Acupuncture, a therapy originating in China, has been widely used for the treatment of neurological disorders, including spinal cord injury (SCI) [13]. Electro-acupuncture (EA) at the acupoints of Governor Vessel (Du Meridian) and Jiaji has proven to have a therapeutic effect in the treatment of spinal cord injury (SCI) both in clinical care and animal experiments [14]. Jiaji acupoints are located on the bilateral spinous processes of lumbar spine [15], 5mm lateral to the posterior midline in rabbits. The sciatic nerve and lumbosacral plexus are located beneath these acupoints. Some studies [16] suggest the sciatic nerve of the rabbit is located between L<sub>7</sub> and S<sub>2</sub> in the spinal cord. However, due to the relationship between sections of lumbosacral spinal cord and their lumbosacral vertebrae in rabbit, we believe that the sciatic nerve is located between L<sub>4</sub> and L<sub>6</sub> of the lumbosacral vertebrae. Neurons of the sciatic nerve and lumbosacral plexus are beneath these acupoints. Since adequate connectivity in spinal circuits and peripheral nervous system integration are also important factors in nerve regrowth [17], Jiaji-EA may help to facilitate sciatic nerve regeneration after the nerve injury via stimulation of the sciatic nerve and lumbosacral plexus.

In our previous animal experiments and clinical practices, we observed that bones that were denervated due to peripheral injury were apt to suffer bone loss followed by pathological fracture. Previous studies focused primarily on the damaged peripheral nerves themselves and denervated muscle [18,19]. Although bone healing combined with peripheral nerve injury has been investigated [4,5,7,8], interventions for denervated bones have not been extensively studied. This study measures the effects of combining treadmill running with Jiaji-EA on tibia bone mass, bone strength and SP expression in rabbits with sciatic nerve injury. We hypothesize that treadmill running combined with Jiaji-EA will decrease bone loss and weakening, and increase SP expression, reducing pathological fracture of denervated bones.

## Materials and Methods

This study was carried out in strict accordance with the recommendations in the Guide for the Care and Use of Laboratory Animals of Chinese Academy of Medical Sciences. The protocol was approved by the Committee on the Ethics of Animal Experiments of the Second Affiliated Hospital of Heilongjiang University of Chinese Medicine, China (Permit Number: ABX20140105A). All surgery was performed under sodium pentobarbital anesthesia, and all efforts were made to minimize suffering.

## Subjects

Twenty-four 11–12 weeks-old male New Zealand white rabbits with a mean weight of  $1.78 \pm 0.12$  kg were randomly assigned to one of 4 groups: sham ( $n = 6$ ), SNCr ( $n = 6$ ), treadmill ( $n = 6$ ), or Jiaji-EA combined with treadmill (ET,  $n = 6$ ). All animals were anesthetized with  $1.5 \pm 0.5$  ml/kg of 10% chloral hydrate via the ear marginal vein. In the SNCr, treadmill, and ET groups, a lateral approach was created on the left hind limb. The incision was located mid-way between the attachment point of rectus femoris tendon on knee joint and the rectus femoris between the upper one third and the midline. The tip of hemostatic forceps covered by thin plastic tubing were used to crush the nerve trunk by full clamping the nerve for 5 minutes [20,21]; this caused damage across approximately 2mm of the nerve. The sham group was subjected to the same surgical procedure with sciatic nerve exposure but without crush injury.

## Intervention Groups

The intervention methods for all groups were as follows: (1) Control groups (sham and SNCr): no intervention, rabbits were removed from cage and placed on a treadmill while treadmill was not operating for 20min each day, as a sham procedure; (2) Treadmill group: before surgery, the rabbits were made to adaptively run on a treadmill on 3 consecutive days. Three days post-surgery, the animals were made to run for 20 minutes a day at a rate of 10m/min for 3 days, at a rate of 15m/min for 20 min/day from the fourth to sixth day, and then at a rate of 20m/min for 20 min/day from the seventh day onward, 6 days/week for a total treatment cycle duration of 4 weeks; (3) ET group: rabbits received treadmill exercise using the same protocol as the treadmill group. In addition, 3 days post-surgery, 6 Jiaji acupoints (3 acupoints on each side) were identified bilateral of the spinous processes of L<sub>4</sub> to L<sub>6</sub> of spine approximately 5mm lateral to the posterior midline. The length of the Jiaji region is approximate 30mm. The four limbs of each animal in the ET group were fixed on the experimental table in the prone position by a thick cotton band. The fur in the acupoint region was shaved and sterilized using iodophor, then a sterile needle (0.20mm in diameter and 25mm in length) was inserted into each acupoint to a depth of 10–15mm. Then the needles were connected to a 3Hz/s electrical current for 30 min/day, 6 days/week for a total treatment duration of 4 weeks (Fig 1). The rabbits in SNCr and Treadmill groups were given a sham procedure, with shaving of back and confinement but without needle insertion and application of electrical current. No anesthesia was used during the electro-acupuncture procedure and the rabbits did not display any increased pain behaviors.

After 4 weeks of treatment, all animals were anesthetized with  $1.5 \pm 0.5$  ml/kg of 10% chloral hydrate via ear marginal vein and their hearts were cut to bleed out after the animals became deeply unconscious to euthanize them. Their left tibias were harvested by disarticulation at the knee and ankle. First, all ligaments around the knee joint and the tendons of gastrocnemius attached at medial and lateral condyles of femur were severed and the tibia was dislocated from the femur. The Achilles tendon was then cut. Next, the entire tricipital muscle was excised from the soft tissues connected to the tibia. Then the anterior tibial muscle was removed from tibia. The ligaments connecting the ankle joint were sheared, separating the tibia and foot. Finally, of the remaining soft tissue on the tibia was removed.

**(1) Functional Analysis (FA).** The motor function of the left hind limb was assessed before the crush injury and 4 weeks post injury using the toe-spreading reflex. The toe-spreading reflex is a reliability, sensitivity and non-invasive method for assessing recovery of peroneal nerve function after injury[22,23]. The procedure was as follows: each rabbit was held by the loose skin of its back then was suddenly lowered through the air without letting them contact a surface. Rabbits with functional nerve innervation reflexively spread their second, third and

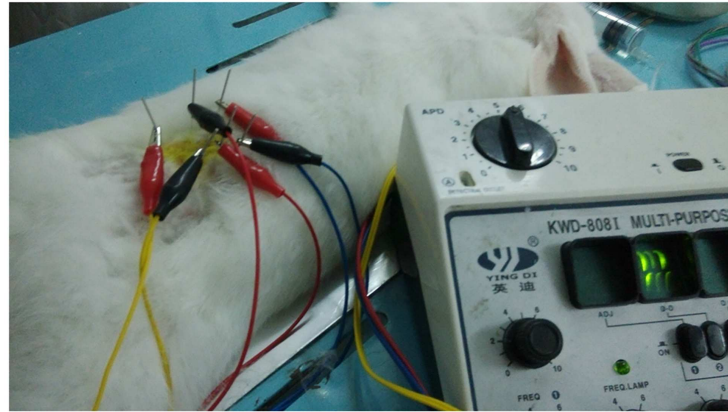

**Fig 1. The therapy of Electro-acupuncture.** The four limbs of each rabbit in the ET group were fixed on the experimental table in the prone position by a thick cotton band. Six sterile needles were inserted into each acupoint to a depth of 10-15mm. Then the needles were connected to a 3Hz/s electrical current.

doi:10.1371/journal.pone.0164652.g001

fourth toes. The movement of these toes was captured using a digital video camera (I-phone 5, USA) and then was graded following the toe-spreading index (TSI) described by E. Gutmann (Table 1)[22,23].

**(2) Bone strength.** Tibias were wrapped in saline soaked gauze and frozen (-20°C) after excision. Bone strength was measured by 3-point bending testing using a Universal Testing Machine (Zwick Z010, Germany) the same day. The tibia was put on the testing apparatus with anterior aspect up. The 3-point bending test was performed with a support span of 60 mm and strain rate of 1mm/min. The Ultimate Load of the tibia was measured at bone failure [24].

**(3) Bone Mineral Density (BMD).** The bone mineral density of each tibia was measured using Dual-Energy X-ray absorptiometry (DXA) (Noland, USA). After strength testing, the bone was divided into two sections. The proximal section was placed on white paper in horizontal position with anterior side up under the DXA. A rectangular area of 1.53cm<sup>2</sup> approximately 1cm below the tibial plateau was scanned to measure BMD.

**(4) SP expression.** After bone strength testing, a 10mm thick sample of cortical bone from approximately the middle of the tibial shaft was sectioned perpendicular to the long axis of each bone (approximate cylinder) and fixed in a formaldehyde solution. A second bone sample was used for BMD testing. The bones were demineralized using EDTA-NaOH. Forty to 50 g of EDTA·2Na was added to 500ml of distilled water and 0.2g of NaOH. Another 350ml of distilled water was added and mixed, and then additional water was added to bring the final volume up to 1000ml. The bone tissue specimens were put into the solution and placed in a 4°C refrigerator and checked daily. The solution was replaced every second day. Bones were considered demineralized when the tissue specimens could be easily stabbed by a pin. Once demineralized, the tissue specimens were washed with distilled water and then embedded in

**Table 1. The toe-spreading index for behavioral analyses.**

| Grade | Symptoms                                                       |
|-------|----------------------------------------------------------------|
| 1     | Just visible spreading of the 4th toe alone (also 2nd and 3rd) |
| 2     | Slight spreading of all three toes                             |
| 3     | Spreading of all three toes (less forceful than normal)        |
| 4     | Full spreading of all three toes (equal to normal)             |

doi:10.1371/journal.pone.0164652.t001

paraffin. Five-micron thick sections of bone (5 sections for each rabbit) were cut using immunohistochemistry method for SP expression. After deparaffinization, the sections were submerged in a solution of phosphate-buffered saline (PBS) with 0.3% Triton-X 100 (pH 7.4) for 30 min and a solution of 0.3% H<sub>2</sub>O<sub>2</sub> for 1 h in order to block endogenous peroxidase. The sections were then incubated with polyclonal SP rabbit antiratantibody diluted 1:2000 in a solution consisting of 1% bovine serum albumin and 0.05% sodium azide in 0.1 M PBS for 24 h at 4°C. After three washings in PBS, the specimens were then exposed to biotinylated goat anti-rabbit -mouse IgG diluted 1:200 in PBS for 4 h at room temperature. Three washings in PBS were followed by treatment with ABC diluted 1:100 in PBS for 4 h at room temperature. The peroxidase reaction was then developed for 10 min in 0.05 M TRIS buffer (pH 7.6) containing 0.02% 3,3-diaminobenzidine tetrahydrochloride and 0.006% H<sub>2</sub>O<sub>2</sub>. [25]. The density of SP-positive staining was analyzed using a Digital medical image analysis system (Motic Med 6.0) [26].

## Analysis

Statistical calculations were performed using SPSS 19.0 for Windows. All data are presented as means  $\pm$  SD. All variables were tested for normal distribution using the Kolmogorov-Smirnov test ( $p > 0.05$ ). One-way analysis of variance (ANOVA) followed by the LSD post-hoc test was used for the statistical analysis. A significant difference was defined as  $p \leq 0.05$ .

## Results

### 1. Functional Analysis (FA)

Motor function recovery was assessed by TSI at 4 weeks of treatment. Before the crush injury, all of TSI measures were grade 4. After 4 weeks of treatment, TSI in injury groups (SNCr, treadmill and ET) were reduced compared to the sham group ( $p < 0.05$ ). The TSI in the treadmill and ET groups was significantly higher compared to the SNCr ( $p < 0.05$ ). Further, the TSI in the ET groups was significantly higher than the treadmill group ( $p < 0.05$ ) (Fig 2).

### 2. BMD of the tibia

Injury to the sciatic nerve led to significant reductions in the BMD of the rabbits' tibias. The SNCr, treadmill, and ET groups all had decreased BMD compared to the sham group ( $p < 0.05$ ). The BMD of the tibia in the treadmill and ET groups was significantly higher compared to the SNCr ( $p < 0.05$ ). Further, the BMD of the tibias in the ET group was significantly higher than the treadmill group ( $p < 0.05$ ) (Table 2).

### 3. Bone strength of the tibia

Significant reductions in the bone strength of the left tibia were noted in the SNCr, treadmill, and ET groups compared to the sham group ( $p < 0.05$ ). Bone strength in the treadmill and ET groups was significantly higher than the SNCr group ( $p < 0.05$ ). The bone strength in the ET group was significantly higher than the treadmill group ( $p < 0.05$ ) (Table 2).

### 4. SP expression in the tibia

Significant reductions in the SP expression in the tibia were found in the SNCr, treadmill, and the ET groups compared to the sham group ( $p < 0.05$ ). SP expression was partially restored by treadmill running. Both the treadmill and ET groups were significantly higher compared to the SNCr group ( $p < 0.05$ ). SP expression in the ET group was significantly higher compared to the treadmill group ( $p < 0.05$ ) (Table 2 and Fig 3).

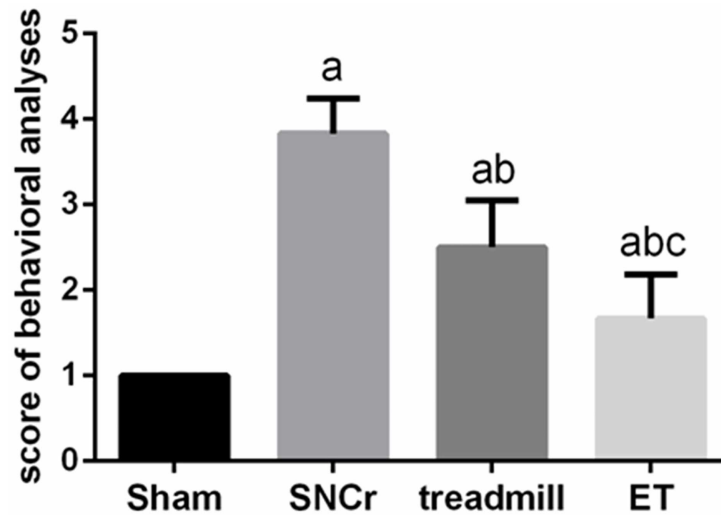

**Fig 2. Comparison of toe-spreading index for behavioral analyses.** After 4 weeks of treatment, compared with Sham group, <sup>a</sup>*P*<0.05; Compared with SNCr group, <sup>b</sup>*P*<0.05; Compared with treadmill group, <sup>c</sup>*P*<0.05.

doi:10.1371/journal.pone.0164652.g002

## Discussion

The purpose of this study was to determine if dynamic, weight-bearing exercise combined with Jiayi-EA improves tibial bone health in rabbits with sciatic nerve injury. In this study, we found that TSI, BMD, bone strength, and SP expression in the tibia are reduced after sciatic nerves injury. TSI, BMD, bone strength, and SP expression can be partially restored by intervening with treadmill running alone. However, TSI, BMD, bone strength, and SP expression levels were further improved by added Jiayi-EA to the treadmill therapy. In the current study, the better TSI, BMD and bone strength found in the ET group are associated with increased expression of SP. SP—immunoreactive nerve fibers innervate the bone and adjacent tissues [27]. SP-immunoreactive axons have been localized in bone, and SP receptors are widely distributed in osteoclasts and osteoblasts [28].

The status of innervation is important for bone union and functional recovery [29]. The lack of neural control may delay fracture healing [30]. Consistent with earlier research, we observed that the BMD and bone strength of the tibia are reduced after sciatic nerves injury [4.5.7.11.29]. Post-traumatic bone loss may be partially the result of decreased functional load bearing (disuse osteoporosis) [31]. This osteopenia can lead to osteoporosis and increased fracture risk [32]. Bone tissues are physiologically exposed to mechanical loading through physical

**Table 2. Comparison of BMD, bone strength and SP 4weeks post treatments.**

| Group(n = 6) | BMD (g/cm <sup>2</sup> )     | Bone strength (N)               | SP                           |
|--------------|------------------------------|---------------------------------|------------------------------|
| Sham         | 0.197±0.008 <sup>a</sup>     | 199.043±16.123                  | 0.035±0.004                  |
| SNCr         | 0.123±0.008                  | 51.315±11.459 <sup>a</sup>      | 0.010±0.005 <sup>a</sup>     |
| Treadmill    | 0.151±0.002 <sup>a,b</sup>   | 86.507±20.942 <sup>a,b</sup>    | 0.017±0.001 <sup>a,b</sup>   |
| ET           | 0.176±0.005 <sup>a,b,c</sup> | 158.539±41.292 <sup>a,b,c</sup> | 0.025±0.002 <sup>a,b,c</sup> |

<sup>a</sup> *p*<0.05 vs. sham group;

<sup>b</sup> *p*<0.05vs.SNCrI group;

<sup>c</sup> *p*<0.05vs.treadmill group.

doi:10.1371/journal.pone.0164652.t002

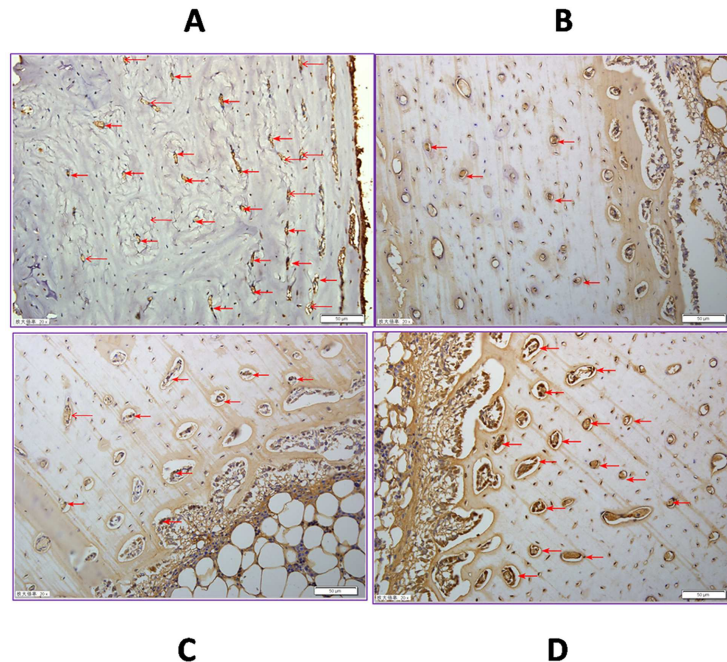

**Fig 3. Substance P semi quantitation of left tibia 4 weeks post treatment.** SP staining is shown in brown (red arrow). Scale bar = 50 $\mu$ m. Values are means  $\pm$ SD of six rabbits in each group. **A.** SP in sham groups were higher than all others ( $p < 0.05$ ); **B.** SP in SNCr group was less than all others ( $p < 0.05$ ); **C.** SP in treadmill group was higher than SNCr group ( $p < 0.05$ ), less than ET group ( $p < 0.05$ ); **D.** SP in ET group was higher than other groups ( $p < 0.05$ ), except sham groups, was lower than sham groups ( $p < 0.05$ ).

doi:10.1371/journal.pone.0164652.g003

activity including exercise, which contributes to development of growing bone [33,34]. In the current study, exercise training (treadmill running) increased cortical thickness in growing bone [35].

Accordingly, load bearing, active exercises are predicted to be among the most important methods to prevent bone loss and to help maintain BMD [36,37]. Various animal models and training modes, including treadmill running, jumping, free fall landing, and passive resistant training, indicate regular exercise is beneficial to bone development and health [37–41]. In this study, we chose treadmill running as the exercise intervention because it is active, full loading, and can be quantified. The main effects of treadmill running may be due to the suppression of bone mass reduction [38]. BMD and bone strength of tibia in the treadmill group were significantly higher compared to the SNCr group but still significantly lower than the sham control, indicating decreases in load bearing play a part but are not solely responsible for bone loss. Running-generated impact and load on bone may suppress metabolic turnover and increase cortical bone mass through increased periosteal apposition [42]. Our results demonstrate that treadmill running can effectively preserve bone mass, consistent with previous findings [43–46].

Several neuropeptides may be local modulators of bone metabolism, influencing periosteal and medullary blood flow, angiogenesis, and nociception, in addition to having direct effects on osteoblasts and osteoclasts [4,47]. Furthermore, a recent study showed that bone and periosteum are innervated by sympathetic and sensory nerve fibers, implicating the peripheral nervous system in bone metabolism and indicating sensory and sympathetic neurotransmitters have crucial trophic effects essential for proper bone formation [11]. Studies of nerve regeneration in animals use a variety of electrophysiological and morphological tests, but these

endpoints do not necessarily correlate with the return of muscle function [23]. Alternatively, FA value can be used to directly determine the prognosis of motor function after peripheral nerve injury [48]. TSI is believed to be an assessment of function that assesses the endpoint of peroneal nerve regeneration [23]. We found that the TSIs of rabbits in SNCr group improved little in the 4 weeks after injury, similar to a previous study [48]. However, the TSIs of rabbits in ET group were superior to all other injury groups. This indicates using Jiaji-EA combine with treadmill running is beneficial for sciatic nerve regeneration after injury.

Nerve regeneration plays a crucial role in improving bone mass. Changes at the spinal cord level may persist for a long time, contributing to chronic deficits after peripheral nerve injuries [49,50]. Thus, modulating the plastic changes at the spinal cord level are important to improve functional recovery [51]. Since the effectiveness of electro-acupuncture at Jiaji acupoints treatment of SCI has been demonstrated in both humans and animals [14], we believed that electrical stimulation of the Jiaji acupoints between L<sub>4</sub> and L<sub>6</sub> of the spine stimulates the sciatic nerve neurons. In addition, our previous study shows that secondary degeneration of neurons is reduced and axon regeneration is facilitated by Jiaji-EA after peripheral nerve injury [unpublished data]. In this study, we observed that the TSI, BMD, bone strength, and SP of tibia in the ET group were significantly increased compared to the SNCr and treadmill groups. These results suggest that bone metabolism may be improved by Jiaji-EA combined with treadmill indirectly in association with axon regeneration and directly via loading on the bone.

Substance P-immunoreactive nerve fibers innervate the bone and adjacent tissues. SP frequently co-localizes with calcitonin gene-related peptide in the peripheral sensory axons of bones [27]. The axon density varies depending on the stage of skeletal development, the location in the body and pathological conditions [18], suggesting a relationship between neuropeptides and bone. In this study, we found significant reductions in the SP expression in the tibia in the SNCr, treadmill, and ET groups compared to the sham group. Our data is consistent with the findings of Kingery et al [52]. They observed rapid, widespread loss of trabecular bone mass in both hind limbs after unilateral sciatic nerve transection in rats. They proposed that the contralateral neurogenic extravasation response was diminished and there was a contralateral reduction in bone SP expression after nerve injury, suggesting inhibiting SP signaling has negative effects on bone mass [52]. Other studies report that SP stimulates osteogenesis and the late stage osteoblastic bone formation [53,54] and the absence of SP reduces the rate of bone formation [30]. Grässel believes that during endochondral ossification, sensory neuropeptide SP promotes proliferation of stem cells and growth plate chondrocytes [55]. In this study, after sciatic nerve injury, tibial SP expression was significantly higher in the treadmill treatment group and highest in the group that received both treadmill and Jiaji-EA therapy. BMD and bone strength were positively correlated with SP expression. The bone health of the juvenile rabbits' tibias was improved by treadmill running. Adding Jiaji-EA to the therapy produced increased benefits.

## Limitations

The current findings point to better recovery in the ET group, however, these results are limited by having no way to determine if the current results were due specifically to stimulation of the Jiaji-EA or the electrostimulation of the general region. Further studies will be needed to determine this. Another limitation is the absence of direct evidence regarding the path by which treadmill combined with Jiaji-EA increased SP expression and improved bone mass after peripheral nerve injury. Further studies will be required to identify the mechanism by which treadmill combined with Jiaji-EA reverses denervation bone loss via signaling pathways.



## Conclusion

The TSI, BMD, bone strength, and SP expression of the tibia decrease after sciatic nerves injury in rabbits. The TSI, BMD and bone strength values were higher in treadmill and ET groups than in SNCr only group. The therapy of treadmill running combined with Jiaji-EA is superior to treadmill running only. Bone mass of rabbits' tibias after sciatic nerve injury was increased by treadmill running combined with Jiaji-EA which is related to increasing the SP expression in the tibia. Combined treatment may facilitate bone mass retention in two ways: indirectly by facilitating axon regeneration and directly via loading on the bone.

## Supporting Information

**S1 Table. The details of BMD, Bone strength, SP and FA.**  
(XLSX)

## Acknowledgments

This study was supported by the Fund of Innovative Talents of the Heilongjiang University of Chinese Medicine (grant number 051290). Additional funding for this study was provided by a postdoctoral research award from the Administration Office of Heilongjiang Postdoctoral Program (grant number LBH-Z13202). We also thank Dr. Zhongping Xu in surgical department of Washington University School of Medicine. The authors have approved the manuscript for publication and vouch for the completeness and accuracy of the data.

## Author Contributions

**Conceptualization:** YW.

**Data curation:** QT.

**Formal analysis:** LZ.

**Funding acquisition:** YW.

**Investigation:** RH LH.

**Methodology:** YW.

**Project administration:** YW.

**Resources:** RH LH.

**Software:** LZ.

**Supervision:** YW.

**Validation:** QT.

**Visualization:** YW.

**Writing – original draft:** YW.

**Writing – review & editing:** MK DZ.

## References

1. Tos P, Ronchi G, Geuna S, Battiston B. Future perspectives in nerve repair and regeneration. *International review of neurobiology*. 2013; 109:165–92. doi: [10.1016/B978-0-12-420045-6.00008-0](https://doi.org/10.1016/B978-0-12-420045-6.00008-0) PMID: [24093612](https://pubmed.ncbi.nlm.nih.gov/24093612/).

2. Johnson EO, Zoubos AB, Soucacos PN. Regeneration and repair of peripheral nerves. *Injury*. 2005; 36 Suppl 4:S24–9. doi: [10.1016/j.injury.2005.10.012](https://doi.org/10.1016/j.injury.2005.10.012) PMID: [16288757](https://pubmed.ncbi.nlm.nih.gov/16288757/).
3. Elziere L, Sar C, Venteo S, Bourane S, Puech S, Sonrier C, et al. CaMKK-CaMK1a, a new post-traumatic signalling pathway induced in mouse somatosensory neurons. *PLoS One*. 2014; 9(5):e97736. doi: [10.1371/journal.pone.0097736](https://doi.org/10.1371/journal.pone.0097736) PMID: [24840036](https://pubmed.ncbi.nlm.nih.gov/24840036/); PubMed Central PMCID: [PMC4026325](https://pubmed.ncbi.nlm.nih.gov/PMC4026325/).
4. Hukkanen M, Konttinen YT, Santavirta S, Nordsletten L, Madsen JE, Almaas R, et al. Effect of sciatic nerve section on neural ingrowth into the rat tibial fracture callus. *Clin Orthop Relat Res*. 1995;(311):247–57. PMID: [7634582](https://pubmed.ncbi.nlm.nih.gov/7634582/).
5. Hukkanen M, Konttinen YT, Santavirta S, Paavolainen P, Gu XH, Terenghi G, et al. Rapid proliferation of calcitonin gene-related peptide-immunoreactive nerves during healing of rat tibial fracture suggests neural involvement in bone growth and remodelling. *Neuroscience*. 1993; 54(4):969–79. PMID: [8341427](https://pubmed.ncbi.nlm.nih.gov/8341427/).
6. Madsen JE, Aune AK, Falch JA, Hukkanen M, Konttinen YT, Santavirta S, et al. Neural involvement in post-traumatic osteopenia: an experimental study in the rat. *Bone*. 1996; 18(5):411–6. PMID: [8739898](https://pubmed.ncbi.nlm.nih.gov/8739898/).
7. Zhang D, Zhang P, Wang Y, Han N, Tang C, Jiang B. The influence of brain injury or peripheral nerve injury on calcitonin gene-related peptide concentration variation and fractures healing process. *Artificial cells, blood substitutes, and immobilization biotechnology*. 2009; 37(2):85–91. doi: [10.1080/10731190902743149](https://doi.org/10.1080/10731190902743149) PMID: [19247856](https://pubmed.ncbi.nlm.nih.gov/19247856/).
8. Apel PJ, Crane D, Northam CN, Callahan M, Smith TL, Teasdall RD. Effect of selective sensory denervation on fracture-healing: an experimental study of rats. *The Journal of bone and joint surgery American volume*. 2009; 91(12):2886–95. doi: [10.2106/JBJS.H.01878](https://doi.org/10.2106/JBJS.H.01878) PMID: [19952252](https://pubmed.ncbi.nlm.nih.gov/19952252/).
9. Otsuka M, Yoshioka K. Neurotransmitter functions of mammalian tachykinins. *Physiological reviews*. 1993; 73(2):229–308. PMID: [7682720](https://pubmed.ncbi.nlm.nih.gov/7682720/).
10. He H, Tan Y, Yang M. Effect of substance P in mandibular osteotomies after amputation of the inferior alveolar nerve. *Journal of oral and maxillofacial surgery: official journal of the American Association of Oral and Maxillofacial Surgeons*. 2010; 68(9):2047–52. doi: [10.1016/j.joms.2010.02.016](https://doi.org/10.1016/j.joms.2010.02.016) PMID: [20728028](https://pubmed.ncbi.nlm.nih.gov/20728028/).
11. Niedermair T, Kuhn V, Doranhegard F, Stange R, Wieskotter B, Beckmann J, et al. Absence of substance P and the sympathetic nervous system impact on bone structure and chondrocyte differentiation in an adult model of endochondral ossification. *Matrix biology: journal of the International Society for Matrix Biology*. 2014; 38:22–35. doi: [10.1016/j.matbio.2014.06.007](https://doi.org/10.1016/j.matbio.2014.06.007) PMID: [25063231](https://pubmed.ncbi.nlm.nih.gov/25063231/).
12. Barenholtz EI, Curry DJ, Bapna MS, Kukreja SC. Effects of endurance exercise on bone mass and mechanical properties in intact and ovariectomized rats. *Journal of bone and mineral research: the official journal of the American Society for Bone and Mineral Research*. 1993; 8(8):937–42. doi: [10.1002/jbmr.5650080806](https://doi.org/10.1002/jbmr.5650080806) PMID: [8213256](https://pubmed.ncbi.nlm.nih.gov/8213256/).
13. Lee H, Park HJ, Park J, Kim MJ, Hong M, Yang J, et al. Acupuncture application for neurological disorders. *Neurological research*. 2007; 29 Suppl 1:S49–54. doi: [10.1179/016164107X172211](https://doi.org/10.1179/016164107X172211) PMID: [17359641](https://pubmed.ncbi.nlm.nih.gov/17359641/).
14. Li WJ, Pan SQ, Zeng YS, Su BG, Li SM, Ding Y, et al. Identification of acupuncture-specific proteins in the process of electro-acupuncture after spinal cord injury. *Neuroscience research*. 2010; 67(4):307–16. doi: [10.1016/j.neures.2010.04.012](https://doi.org/10.1016/j.neures.2010.04.012) PMID: [20438770](https://pubmed.ncbi.nlm.nih.gov/20438770/).
15. Huang GF, Zou J, Shi J, Zhang DY, Peng HF, Zhang Q, et al. Electroacupuncture stimulates remodeling of extracellular matrix by inhibiting apoptosis in a rabbit model of disc degeneration. *Evidence-based complementary and alternative medicine: eCAM*. 2015; 2015:386012. doi: [10.1155/2015/386012](https://doi.org/10.1155/2015/386012) PMID: [25763091](https://pubmed.ncbi.nlm.nih.gov/25763091/); PubMed Central PMCID: [PMC4339975](https://pubmed.ncbi.nlm.nih.gov/PMC4339975/).
16. Greenaway JB, Partlow GD, Gonsholt NL, Fisher KR. Anatomy of the lumbosacral spinal cord in rabbits. *Journal of the American Animal Hospital Association*. 2001; 37(1):27–34. doi: [10.5326/15473317-37-1-27](https://doi.org/10.5326/15473317-37-1-27) PMID: [11204474](https://pubmed.ncbi.nlm.nih.gov/11204474/).
17. Navarro X, Vivo M, Valero-Cabre A. Neural plasticity after peripheral nerve injury and regeneration. *Progress in neurobiology*. 2007; 82(4):163–201. doi: [10.1016/j.pneurobio.2007.06.005](https://doi.org/10.1016/j.pneurobio.2007.06.005) PMID: [17643733](https://pubmed.ncbi.nlm.nih.gov/17643733/).
18. Nagata K, Itaka K, Baba M, Uchida S, Ishii T, Kataoka K. Muscle-targeted hydrodynamic gene introduction of insulin-like growth factor-1 using polyplex nanomicelle to treat peripheral nerve injury. *Journal of controlled release: official journal of the Controlled Release Society*. 2014; 183:27–34. doi: [10.1016/j.jconrel.2014.03.021](https://doi.org/10.1016/j.jconrel.2014.03.021) PMID: [24657809](https://pubmed.ncbi.nlm.nih.gov/24657809/).
19. Schaakxs D, Kalbermatten DF, Pralong E, Raffoul W, Wiberg M, Kingham PJ. Poly-3-hydroxybutyrate strips seeded with regenerative cells are effective promoters of peripheral nerve repair. *Journal of tissue engineering and regenerative medicine*. 2015. doi: [10.1002/term.1980](https://doi.org/10.1002/term.1980) PMID: [25556632](https://pubmed.ncbi.nlm.nih.gov/25556632/).
20. Li X, Shen J, Chen J, Wang X, Liu Q, Liang B. Magnetic resonance imaging evaluation of acute crush injury of rabbit sciatic nerve: correlation with histology. *Canadian Association of Radiologists journal = Journal l'Association canadienne des radiologistes*. 2008; 59(3):123–30. PMID: [18697718](https://pubmed.ncbi.nlm.nih.gov/18697718/).

21. Wang Y, Ma M, Tang Q, Zhu L, Koleini M, Zou D. The effects of different tensile parameters for the neurodynamic mobilization technique on tricipital muscle wet weight and MuRf-1 expression in rabbits with sciatic nerve injury. *Journal of neuroengineering and rehabilitation*. 2015; 12:38. doi: [10.1186/s12984-015-0034-4](https://doi.org/10.1186/s12984-015-0034-4) PMID: [25889989](https://pubmed.ncbi.nlm.nih.gov/25889989/); PubMed Central PMCID: PMC4403708.
22. Gutmann E. Factors Affecting Recovery of Motor Function after Nerve Lesions. *Journal of neurology and psychiatry*. 1942; 5(3–4):81–95. PMID: [21611404](https://pubmed.ncbi.nlm.nih.gov/21611404/); PubMed Central PMCID: PMC1089897.
23. Schmitz HC, Beer GM. The toe-spreading reflex of the rabbit revisited—functional evaluation of complete peroneal nerve lesions. *Laboratory animals*. 2001; 35(4):340–5. PMID: [11669318](https://pubmed.ncbi.nlm.nih.gov/11669318/).
24. Starnes JW, Neidre DB, Nyman JS, Roy A, Nelson MJ, Gutierrez G, et al. Synergistic effect of exercise and statins on femoral strength in rats. *Experimental gerontology*. 2013; 48(8):751–5. doi: [10.1016/j.exger.2013.04.007](https://doi.org/10.1016/j.exger.2013.04.007) PMID: [23628500](https://pubmed.ncbi.nlm.nih.gov/23628500/).
25. Ding Wen-Ge, Zhang Zi-Ming, Zhang Yue-Hui, Jiang Sheng-Dan, Jiang Lei-Sheng, Dai Li-Yang, Changes of substance P during fracture healing in ovariectomized mice, *Regulatory Peptides* 159 (2010) 28–34] doi: [10.1016/j.regpep.2009.11.004](https://doi.org/10.1016/j.regpep.2009.11.004) PMID: [19903498](https://pubmed.ncbi.nlm.nih.gov/19903498/)
26. Rude RK, Gruber HE, Norton HJ, Wei LY, Frausto A, Kilburn J. Reduction of dietary magnesium by only 50% in the rat disrupts bone and mineral metabolism. *Osteoporosis international: a journal established as result of cooperation between the European Foundation for Osteoporosis and the National Osteoporosis Foundation of the USA*. 2006; 17(7):1022–32. doi: [10.1007/s00198-006-0104-3](https://doi.org/10.1007/s00198-006-0104-3) PMID: [16601920](https://pubmed.ncbi.nlm.nih.gov/16601920/).
27. Bjurholm A, Kreicbergs A, Brodin E, Schultzberg M. Substance P- and CGRP-immunoreactive nerves in bone. *Peptides*. 1988; 9(1):165–71. PMID: [2452430](https://pubmed.ncbi.nlm.nih.gov/2452430/).
28. Gunjigake Kaori K., Goto Tetsuya, Nakao Kayoko, Konoo Tetsuro, Kobayashi Shigeru and Yamaguchi Kazunori. Correlation between the Appearance of Neuropeptides in the Rat Trigeminal Ganglion and Reinnervation of the Healing Root Socket after Tooth Extraction. *Acta Histochem. Cytochem.* 39 (3): 69–77, 2006 doi: [10.1267/ahc.05057](https://doi.org/10.1267/ahc.05057) PMID: [17327926](https://pubmed.ncbi.nlm.nih.gov/17327926/)
29. Varsegova TN, Shchudlo NA, Shchudlo MM, Saifutdinov MS, Stepanov MA. The effects of tibial fracture and Ilizarov osteosynthesis on the structural reorganization of sciatic and tibial nerves during the bone consolidation phase and after fixator removal. *Strategies in trauma and limb reconstruction*. 2015; 10 (2):87–94. doi: [10.1007/s11751-015-0227-1](https://doi.org/10.1007/s11751-015-0227-1) PMID: [26254046](https://pubmed.ncbi.nlm.nih.gov/26254046/); PubMed Central PMCID: PMC4570886.
30. Santavirta S, Kontinen YT, Nordstrom D, Makela A, Sorsa T, Hukkanen M, et al. Immunologic studies of nonunited fractures. *Acta orthopaedica Scandinavica*. 1992; 63(6):579–86. PMID: [1471500](https://pubmed.ncbi.nlm.nih.gov/1471500/).
31. Rubin CT, Lanyon LE. Regulation of bone formation by applied dynamic loads. *The Journal of bone and joint surgery American volume*. 1984; 66(3):397–402. PMID: [6699056](https://pubmed.ncbi.nlm.nih.gov/6699056/).
32. de Bruin ED, Vanwanseele B, Dambacher MA, Dietz V, Stussi E. Long-term changes in the tibia and radius bone mineral density following spinal cord injury. *Spinal cord*. 2005; 43(2):96–101. doi: [10.1038/sj.sc.3101685](https://doi.org/10.1038/sj.sc.3101685) PMID: [15534621](https://pubmed.ncbi.nlm.nih.gov/15534621/).
33. Bailey DA, Baxter-Jones AD, Mirwald RL, Faulkner RA. Bone growth and exercise studies: The complications of maturation. *Journal of musculoskeletal & neuronal interactions*. 2003; 3(4):335–7; discussion 56. PMID: [15758316](https://pubmed.ncbi.nlm.nih.gov/15758316/).
34. Forwood MR. Physical activity and bone development during childhood: insights from animal models. *Journal of applied physiology*. 2008; 105(1):334–41. doi: [10.1152/jappphysiol.00040.2008](https://doi.org/10.1152/jappphysiol.00040.2008) PMID: [18420723](https://pubmed.ncbi.nlm.nih.gov/18420723/).
35. McCarthy RN, Jeffcott LB. Effects of treadmill exercise on cortical bone in the third metacarpus of young horses. *Research in veterinary science*. 1992; 52(1):28–37. PMID: [1553435](https://pubmed.ncbi.nlm.nih.gov/1553435/).
36. Kerr D, Ackland T, Maslen B, Morton A, Prince R. Resistance training over 2 years increases bone mass in calcium-replete postmenopausal women. *Journal of bone and mineral research: the official journal of the American Society for Bone and Mineral Research*. 2001; 16(1):175–81. doi: [10.1359/jbmr.2001.16.1.175](https://doi.org/10.1359/jbmr.2001.16.1.175) PMID: [11149482](https://pubmed.ncbi.nlm.nih.gov/11149482/).
37. Nikander R, Sievanen H, Heinonen A, Daly RM, Uusi-Rasi K, Kannus P. Targeted exercise against osteoporosis: A systematic review and meta-analysis for optimising bone strength throughout life. *BMC medicine*. 2010; 8:47. doi: [10.1186/1741-7015-8-47](https://doi.org/10.1186/1741-7015-8-47) PMID: [20663158](https://pubmed.ncbi.nlm.nih.gov/20663158/); PubMed Central PMCID: PMC2918523.
38. Iwamoto J, Takeda T, Sato Y. Effect of treadmill exercise on bone mass in female rats. *Experimental animals / Japanese Association for Laboratory Animal Science*. 2005; 54(1):1–6. PMID: [15725675](https://pubmed.ncbi.nlm.nih.gov/15725675/).
39. Notomi T, Okazaki Y, Okimoto N, Saitoh S, Nakamura T, Suzuki M. A comparison of resistance and aerobic training for mass, strength and turnover of bone in growing rats. *European journal of applied physiology*. 2000; 83(6):469–74. doi: [10.1007/s004210000316](https://doi.org/10.1007/s004210000316) PMID: [11192051](https://pubmed.ncbi.nlm.nih.gov/11192051/).
40. Umemura Y, Ishiko T, Yamauchi T, Kurono M, Mashiko S. Five jumps per day increase bone mass and breaking force in rats. *Journal of bone and mineral research: the official journal of the American Society for Bone and Mineral Research*. 1997; 12(9):1480–5. doi: [10.1359/jbmr.1997.12.9.1480](https://doi.org/10.1359/jbmr.1997.12.9.1480) PMID: [9286765](https://pubmed.ncbi.nlm.nih.gov/9286765/).

41. Welch JM, Weaver CM, Turner CH. Adaptations to free-fall impact are different in the shafts and bone ends of rat forelimbs. *Journal of applied physiology*. 2004; 97(5):1859–65. doi: [10.1152/jappphysiol.00438.2004](https://doi.org/10.1152/jappphysiol.00438.2004) PMID: [15258128](https://pubmed.ncbi.nlm.nih.gov/15258128/).
42. Iwamoto J, Shimamura C, Takeda T, Abe H, Ichimura S, Sato Y, et al. Effects of treadmill exercise on bone mass, bone metabolism, and calciotropic hormones in young growing rats. *Journal of bone and mineral metabolism*. 2004; 22(1):26–31. doi: [10.1007/s00774-003-0443-5](https://doi.org/10.1007/s00774-003-0443-5) PMID: [14691683](https://pubmed.ncbi.nlm.nih.gov/14691683/).
43. Bourrin S, Palle S, Pupier R, Vico L, Alexandre C. Effect of physical training on bone adaptation in three zones of the rat tibia. *Journal of bone and mineral research: the official journal of the American Society for Bone and Mineral Research*. 1995; 10(11):1745–52. doi: [10.1002/jbmr.5650101118](https://doi.org/10.1002/jbmr.5650101118) PMID: [8592952](https://pubmed.ncbi.nlm.nih.gov/8592952/).
44. Fuchs RK, Shea M, Durski SL, Winters-Stone KM, Widrick J, Snow CM. Individual and combined effects of exercise and alendronate on bone mass and strength in ovariectomized rats. *Bone*. 2007; 41(2):290–6. doi: [10.1016/j.bone.2007.04.179](https://doi.org/10.1016/j.bone.2007.04.179) PMID: [17544352](https://pubmed.ncbi.nlm.nih.gov/17544352/).
45. Huang TH, Lin SC, Chang FL, Hsieh SS, Liu SH, Yang RS. Effects of different exercise modes on mineralization, structure, and biomechanical properties of growing bone. *Journal of applied physiology*. 2003; 95(1):300–7. doi: [10.1152/jappphysiol.01076.2002](https://doi.org/10.1152/jappphysiol.01076.2002) PMID: [12611764](https://pubmed.ncbi.nlm.nih.gov/12611764/).
46. Huang TH, Yang RS, Hsieh SS, Liu SH. Effects of caffeine and exercise on the development of bone: a densitometric and histomorphometric study in young Wistar rats. *Bone*. 2002; 30(1):293–9. PMID: [11792600](https://pubmed.ncbi.nlm.nih.gov/11792600/).
47. Hukkanen M, Kontinen YT, Rees RG, Gibson SJ, Santavirta S, Polak JM. Innervation of bone from healthy and arthritic rats by substance P and calcitonin gene related peptide containing sensory fibers. *The Journal of rheumatology*. 1992; 19(8):1252–9. PMID: [1383542](https://pubmed.ncbi.nlm.nih.gov/1383542/).
48. Yamasaki T, Fujiwara H, Oda R, Mikami Y, Ikeda T, Nagae M, et al. In vivo evaluation of rabbit sciatic nerve regeneration with diffusion tensor imaging (DTI): correlations with histology and behavior. *Magnetic resonance imaging*. 2015; 33(1):95–101. doi: [10.1016/j.mri.2014.09.005](https://doi.org/10.1016/j.mri.2014.09.005) PMID: [25271136](https://pubmed.ncbi.nlm.nih.gov/25271136/).
49. de Medinaceli L. Functional consequences of experimental nerve lesions: effects of reinnervation blend. *Experimental neurology*. 1988; 100(1):166–78. PMID: [3350087](https://pubmed.ncbi.nlm.nih.gov/3350087/).
50. Valero-Cabre A, Navarro X. H reflex restitution and facilitation after different types of peripheral nerve injury and repair. *Brain research*. 2001; 919(2):302–12. PMID: [11701142](https://pubmed.ncbi.nlm.nih.gov/11701142/).
51. Asensio-Pinilla E, Udina E, Jaramillo J, Navarro X. Electrical stimulation combined with exercise increase axonal regeneration after peripheral nerve injury. *Experimental neurology*. 2009; 219(1):258–65. doi: [10.1016/j.expneurol.2009.05.034](https://doi.org/10.1016/j.expneurol.2009.05.034) PMID: [19500575](https://pubmed.ncbi.nlm.nih.gov/19500575/).
52. Kingery WS, Offley SC, Guo TZ, Davies MF, Clark JD, Jacobs CR. A substance P receptor (NK1) antagonist enhances the widespread osteoporotic effects of sciatic nerve section. *Bone*. 2003; 33(6):927–36. PMID: [14678852](https://pubmed.ncbi.nlm.nih.gov/14678852/).
53. Goto T, Nakao K, Gunjigake KK, Kido MA, Kobayashi S, Tanaka T. Substance P stimulates late-stage rat osteoblastic bone formation through neurokinin-1 receptors. *Neuropeptides*. 2007; 41(1):25–31. PMID: [17204323](https://pubmed.ncbi.nlm.nih.gov/17204323/).
54. Shih C, Bernard GW. Neurogenic substance P stimulates osteogenesis in vitro. *Peptides*. 1997; 18(2):323–6. PMID: [9149307](https://pubmed.ncbi.nlm.nih.gov/9149307/).
55. Grassel Susanne. The role of peripheral nerve fibers and their neurotransmitters in cartilage and bone physiology and pathophysiology. *Arthritis Research & Therapy* 2014, 6:485 <http://arthritis-research.com/content/16/6/485>
